# Supplementary material
Source: MDPI journal article supplement (https://www.mdpi.com/2073-4395/13/5/1320)
Supplement: s1 [file s1]

**Table S1.** Monthly average minimum (Min) and maximum (Max) temperatures, growing degree days (GDD), relative humidity (RH), and total rainfall (Rain) in 2020 and 2021 growing seasons as well as 28-yr monthly averages (1994–2021).

| Month                        | Min (° C) | Max (° C) | GDD (° C) | RH (%) | Rain (mm) |
|------------------------------|-----------|-----------|-----------|--------|-----------|
| First growing season (2020)  |           |           |           |        |           |
| May                          | 15.32     | 32.47     | 430.8     | 58.61  | 0.00      |
| June                         | 18.77     | 36.79     | 533.5     | 47.50  | 0.00      |
| July                         | 21.85     | 40.03     | 649.1     | 45.26  | 0.00      |
| August                       | 22.37     | 39.99     | 656.5     | 47.45  | 0.00      |
| September                    | 22.18     | 38.69     | 613.2     | 54.47  | 0.00      |
| Second growing season (2021) |           |           |           |        |           |
| May                          | 18.17     | 35.90     | 509.0     | 39.53  | 0.00      |
| June                         | 19.62     | 37.61     | 558.5     | 44.00  | 0.00      |
| July                         | 22.63     | 40.23     | 664.3     | 43.65  | 0.00      |
| August                       | 23.35     | 40.47     | 679.2     | 45.96  | 0.00      |
| September                    | 21.46     | 36.77     | 573.4     | 52.67  | 0.00      |
| 28-years average (1994-2021) |           |           |           |        |           |
| May                          | 16.72     | 33.28     |           | 41.79  | 0.49      |
| June                         | 19.44     | 37.68     |           | 39.65  | 0.27      |
| July                         | 21.95     | 38.91     |           | 41.40  | 0.16      |
| August                       | 22.56     | 38.66     |           | 44.85  | 0.01      |
| September                    | 20.61     | 35.92     |           | 49.42  | 0.04      |

**Table S2.** Chemical analysis of the Moringa seed extract

| Component                                             | Value |
|-------------------------------------------------------|-------|
| <b>Antioxidants and osmoprotectants</b>               |       |
| Total free amino acids (g kg <sup>-1</sup> DW)        | 156   |
| Free proline (g kg <sup>-1</sup> DW)                  | 132   |
| Soluble sugars (g kg <sup>-1</sup> DW)                | 176   |
| Salicylic acid (mg kg <sup>-1</sup> DW)               | 38.6  |
| $\alpha$ -Tocopherol (mg kg <sup>-1</sup> DW)         | 34.4  |
| Glutathione (mg kg <sup>-1</sup> DW)                  | 22.4  |
| Ascorbic acid (mg kg <sup>-1</sup> DW)                | 34.8  |
| Vitamin A, $\beta$ -carotene (mg kg <sup>-1</sup> DW) | 163   |
| Selenium (mg kg <sup>-1</sup> DW)                     | 0.7   |
| DPPH-radical scavenging (%)                           | 82.2  |
| <b>Phytohormones</b>                                  |       |
| Total auxins (mg kg <sup>-1</sup> DW)                 | 3.3   |
| Total gibberellins (mg kg <sup>-1</sup> DW)           | 2.9   |
| Zeatin-type cytokinin (mg kg <sup>-1</sup> DW)        | 3.2   |
| <b>Mineral nutrients</b>                              |       |
| Nitrogen (g kg <sup>-1</sup> DW)                      | 30.8  |
| Phosphorus (g kg <sup>-1</sup> DW)                    | 15.8  |
| Potassium (g kg <sup>-1</sup> DW)                     | 21.7  |
| Calcium (g kg <sup>-1</sup> DW)                       | 9.6   |
| Magnesium (g kg <sup>-1</sup> DW)                     | 4.5   |
| Sulfur (g kg <sup>-1</sup> DW)                        | 2.7   |
| Iron (g kg <sup>-1</sup> DW)                          | 1.5   |
| Manganese (g kg <sup>-1</sup> DW)                     | 0.8   |
